# Supplementary material
Source: Springer Nature journal article supplement (https://www.springermedizin.de/resource/supplementary/12865_2010_342_MOESM1_ESM.pdf/9427792)

## A. Cholesterol

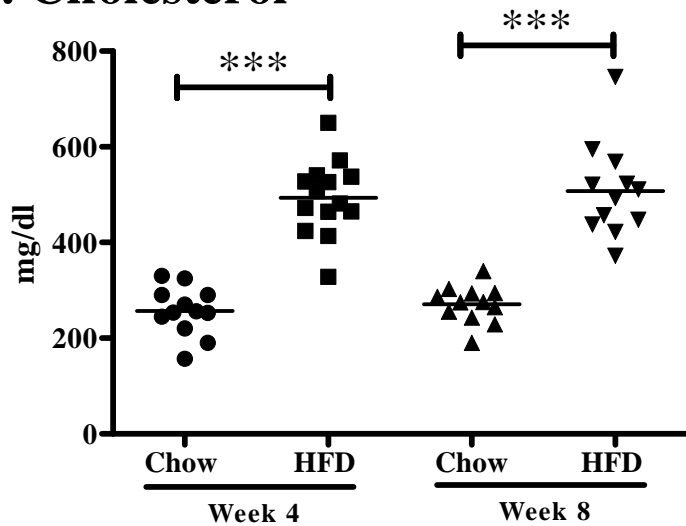

## B. Triglycerides

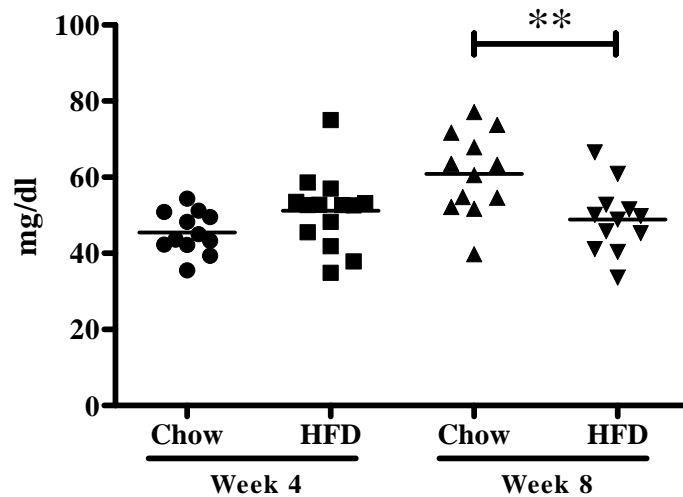

## C. HDL

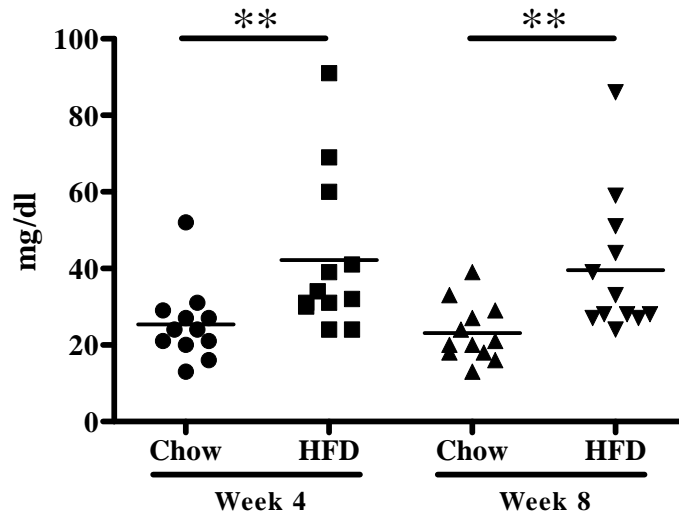

Supplement: MOESM1 [file 9427792]
